# Supplementary material for: Oxidative Stress Markers and Antioxidant Enzymes in Children and Adolescents with Depressive Disorder and Impact of Omega-3 Fatty Acids in Randomised Clinical Trial
Source: MDPI journal article supplement (doi:10.3390/antiox10081256), 2021-08-05
Supplement: s1 [file s1]

**Table S1. Baseline characteristics of depressed patients and healthy controls.**

| Parameter                | Patients    |             |            | <i>p</i> -Value | Healthy Controls |             |             | <i>p</i> -Value | <i>p</i> -Value |
|--------------------------|-------------|-------------|------------|-----------------|------------------|-------------|-------------|-----------------|-----------------|
|                          | All         | Male        | Female     | M vs. F         | All              | Male        | Female      | M vs. F         | P vs. C         |
| <i>n</i>                 | 58          | 12          | 46         |                 | 20               | 8           | 12          |                 |                 |
| Age (years)              | 15.6 ± 1.6  | 16.4 ± 2.2  | 15.3 ± 1.3 | 0.235           | 14.8 ± 2.4       | 14.0 ± 2.5  | 14.4 ± 2.5  | 0.621           | 0.059           |
| Weight (kg)              | 60.3 ± 11.7 | 68.2 ± 15.5 | 56.8 ± 9.3 | <b>0.015</b>    | 54.9 ± 18.8      | 56.1 ± 21.2 | 54.1 ± 17.8 | 0.435           | 0.147           |
| Height (m)               | 1.68 ± 0.1  | 1.74 ± 0.1  | 1.66 ± 0.1 | <b>0.016</b>    | 1.6 ± 0.2        | 1.6 ± 0.2   | 1.6 ± 0.1   | 0.543           | 0.471           |
| BMI (kg/m <sup>2</sup> ) | 21.14 ± 2.7 | 22.4 ± 3.6  | 20.5 ± 2.8 | 0.532           | 20.6 ± 4.2       | 20.1 ± 3.0  | 20.9 ± 5.0  | 0.498           | 0.537           |

M = male, F = female, P = patient, C = healthy controls, *p* = statistical significance, vs. = versus, *n* = number of individuals.
